# Supplementary material for: The green microalga Lobosphaera incisa harbours an arachidonate 15S‐lipoxygenase
Source: PubMed Central journal article supplement (PMC6587457; doi:10.1111/plb.12920), 2018-10-24
Supplement: PLB-21-131-s001.pdf [file PLB-21-131-s001.pdf]

MELGLGARQAVLQPAAASRAPLGLLKAGHRAQQRRLPSPVSVSASASVTQGI PQTSFLQKARDSVLPHGAP  
FTPTSKDSVQWTTTTIYTTQLLRPEIHDLGFVEVLLASEDKAVSERMTLKGFSRKPWTNLDGVPKWGAIFT  
GTLMLPAA MAKPAVMFININHPPEGVQYFFANKIALDGPPGKTAHVDFVINSHVDSGPDAPRPFFFTAQAYL  
PHAPMPDYLAELREHELAILRGTA AAAKHERKGSERYDYDVYNDLGTPTSRPALGGDTLKYPRRLRTGR  
RVVNGTEVA AKGKDWLPPDERFDDRKQENFDSRTLLATLPALSANLLAALVPAGLQKLLRTPGSEFMSISD  
IEQLYSGNAAEDNEDNVLTNLVAPAAAPLAAAILGLLTQNSAQGNT PQKVFEQLSDFNKEVVNGALDALVVS  
LDDL GQSQR AAILHALSLTEKDFQEYAQAGTGRHEVHPVHANFVNLLQEVLRLLHFSTPAVIREGREGAW  
TTDEEWGREQLAGQNACMIHAIWNDAPIKDLPADSAITEAVLQGHLEGHSISQLLSGDKPRLFLIDYMKGF  
KDYAEKIAAAHPGNV MYAGRAVL YLR TDGELVPVAIELQAPRRKLEAFTSADSPTIWLLAKCIFSSIDAGY  
HQLISHFVRAHACTEPYIIATRRLSVMHPVFKLLITHCRFTLNVNSNARQQLINAGGII EGNFTPGRYAM  
ELSSVVYGLTWTTFDSQALPHDLVNRGVARREKDGTLKLLMADYPYAADGLLVWDAFVEWFDSYLRLYYDDE  
VDGKRVTDDPEITAWWTEIQEKGHDPDIKEGWPQLQTIADLTQILTTIAWIASAHHAAINYGQYDYSGFMPN  
RSPMIRKAMPKESDDFKTLAAQDAETAILPFLASPLQATQVMATLGLLSTHSENEEYINDLEHPYLMVGT  
EAYNKYKEFLSRLKQAEDTIKKRNADSQGHVIRAGPD AIHYRLMNPSSITENGDVQRQGV TMSGIPTSVSM

Additional file 1. Shorter and Longer versions of the putative lipoxygenase from *L. incisa*. The shorter version is shown in black. The longer version corresponds to the whole sequence, in red and black.
