# Supplementary material for: The green microalga Lobosphaera incisa harbours an arachidonate 15S‐lipoxygenase
Source: PubMed Central journal article supplement (PMC6587457; doi:10.1111/plb.12920), 2018-10-24
Supplement: PLB-21-131-s002.pdf [file PLB-21-131-s002.pdf]

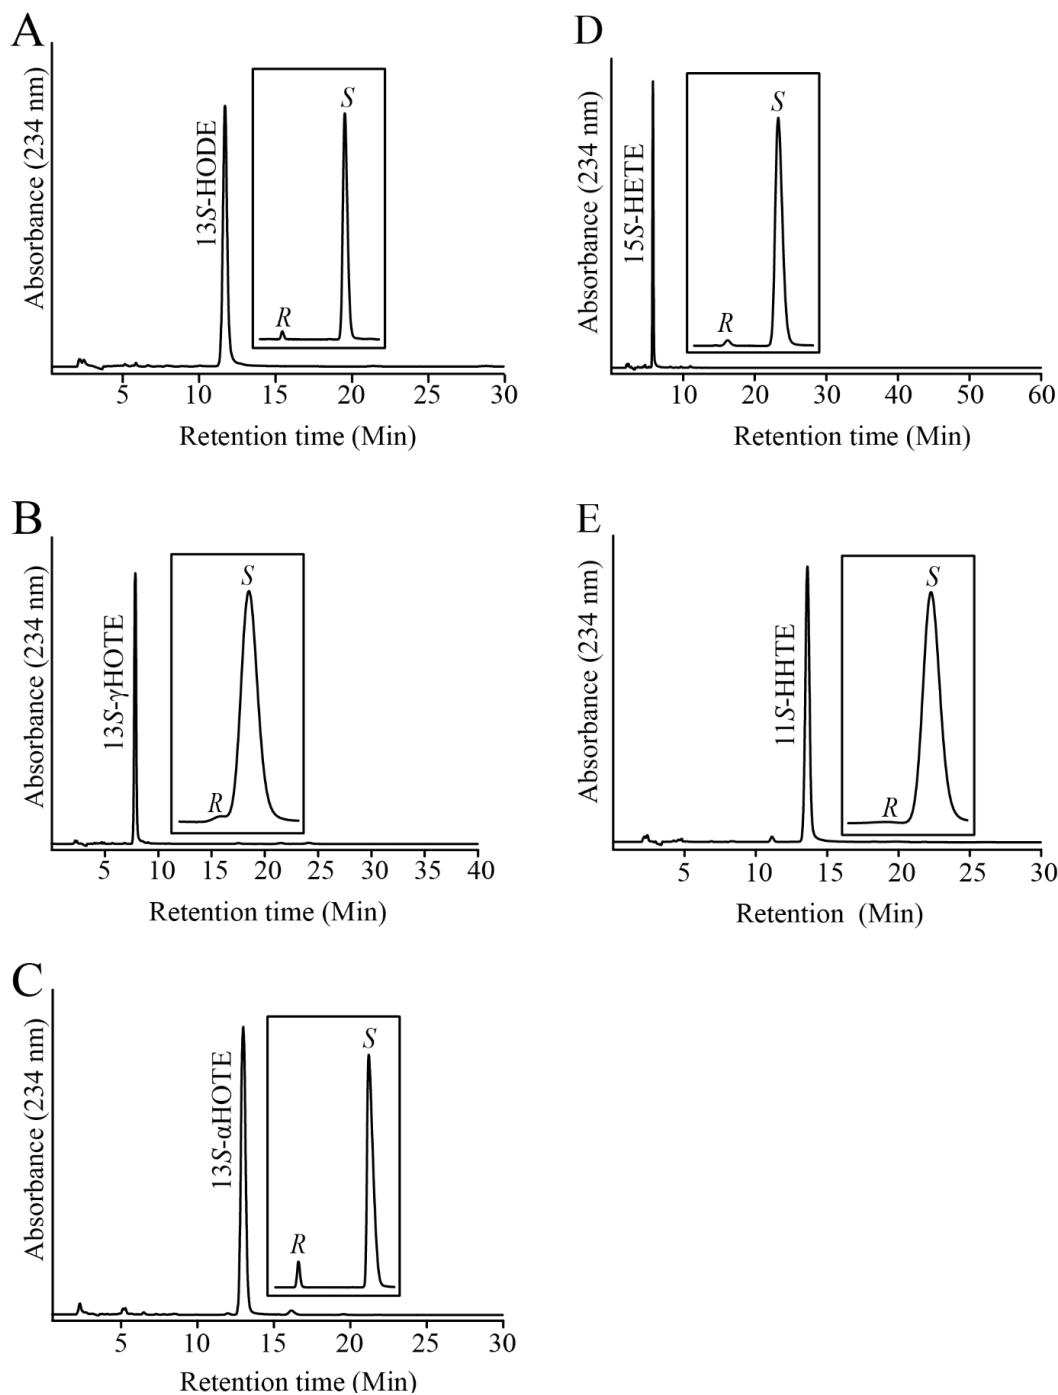

**Additional file 2** Identification of regioisomers and stereoisomers of LiLOX products. The reaction mixture contained 1  $\mu$ g of purified LiLOX in 20 mM Bis-TRIS propane buffer pH 7.5 and 100  $\mu$ M of respective PUFA. Reactions took place for 1 h at room temperature with accessible oxygen. Products were reduced by sodium borohydride for 10 minutes at room temperature and extracted with diethylether. **A-E.** SPHPLC chromatogram of LiLOX products derived from the following PUFA acid substrates: **A.** 18:2(n-6); **B.** 18:3(n-6); **C.** 18:3(n-3); **D.** 20:4(n-6); **E.** 16:3(n-3). Results shown are representative for three independent experiments. Each experiments was performed with different enzyme preparations. For each main product, the respective chromatogram of the Chiral Phase CP-HPLC is represented in the corresponding box, representative of one measurement. All isomers were identified with authentic standards besides the Stereoisomers 11R-HHTE/11S-HHTE and 11R-HHDE/11S-HHDE which were tentatively assigned. All LiLOX products were detected at 234 nm.
